# Supplementary material for: A collaborative semantic-based provenance management platform for reproducibility
Source: PeerJ journal article supplement (doi:10.7717/peerj-cs.921), 2022-03-10
Supplement: Supplemental_Figure_S1.pdf [file Supplemental_Figure_S1.pdf]

- Explore Tags Shares
- All Members
- Binding on modulatory CNG subunits 14
    - cAMP/cGMP efficiency on A1
    - cAMP/cGMP efficiency on A1:B1a
    - ...e-binding A1-617-GFP:B1a via FRET
    - ...ding A1-617-GFP:B1adeltaB via FRET
    - dose-binding A1:B1a-1204-GFP
    - dose-binding A1:B1a-1204-GFP
    - dose-binding A1:B1adeltaB-1204-GFP
    - ...-response A1-617-GFP:B1a + cGMP
    - dose-response A1:B1a + cGMP
    - dose-response A1:B1a + fcGMP
    - dose-response A1:B1adeltaB
    - fcGMP affinity to CNGA1:B1a
    - ...ane integration of A1:B1a-1204-GFP
    - ...brane integration of B1a-1204-GFP
  - Binding via FRET 9
    - dose-binding A1-617-GFP
    - dose-response A1-617-GFP
    - dose-responses A1
    - fcGMP affinity to CNGA1
    - fcGMP affinity to CNGA1-617-GFP
    - fcGMP efficiency
    - FRET specificity to ligand binding
    - GFP bleaching
    - P1fcGMP washout
  - Example Data 2
    - Staining cellular compartments
    - Terminal Ganglion P. americana
  - Late HR Dynamics 8
    - ...ion of EGFP-RAD51 and Cherry-RAD54
    - EGFP-RAD51 time lapse
    - EGFP-RAD51/mCherry-RAD54

### The Plot

| Experiment                                                  | Name                  | AgentName            | AgentRole      | ger   |
|-------------------------------------------------------------|-----------------------|----------------------|----------------|-------|
| <a href="https://w3id.org/repro">https://w3id.org/repro</a> | Staining cellular com |                      | Research Group | 2019- |
| <a href="https://w3id.org/repro">https://w3id.org/repro</a> | Staining cellular com |                      | Contact Person | 2019- |
| <a href="https://w3id.org/repro">https://w3id.org/repro</a> | Staining cellular com | Bioimaging Practical | Project        | 2019- |

Page 1 of 1

Previous Next

10 rows

### The Characters

| Experiment                                                  | Agent                                                       | AgentName            | Role    |
|-------------------------------------------------------------|-------------------------------------------------------------|----------------------|---------|
| <a href="https://w3id.org/repro">https://w3id.org/repro</a> | <a href="https://w3id.org/repro">https://w3id.org/repro</a> | Bioimaging Practical | Project |

Page 1 of 1

Previous Next

10 rows

### Materials

| material                                                                                  | Name     | usedin                                                                                      | usedinstep |
|-------------------------------------------------------------------------------------------|----------|---------------------------------------------------------------------------------------------|------------|
| <a href="https://w3id.org/reproduceme#Vector_1">https://w3id.org/reproduceme#Vector_1</a> | pEGFP-C1 | <a href="https://w3id.org/reproduceme#Vector_3">https://w3id.org/reproduceme#Vector_3</a>   |            |
| <a href="https://w3id.org/reproduceme#Vector_1">https://w3id.org/reproduceme#Vector_1</a> | pEGFP-C1 | <a href="https://w3id.org/reproduceme#Vector_4">https://w3id.org/reproduceme#Vector_4</a>   |            |
| <a href="https://w3id.org/reproduceme#Vector_1">https://w3id.org/reproduceme#Vector_1</a> | pEGFP-C1 | <a href="https://w3id.org/reproduceme#Plasmid_1">https://w3id.org/reproduceme#Plasmid_1</a> |            |
| <a href="https://w3id.org/reproduceme#Vector_1">https://w3id.org/reproduceme#Vector_1</a> | pEGFP-C1 | <a href="https://w3id.org/reproduceme#Plasmid_2">https://w3id.org/reproduceme#Plasmid_2</a> |            |

Example Data [Grid] [Link]

Project ID: 104 Show all

Owner: Tom Kache

Project Details

Add Description

Creation Date: 2019-03-01 21:24:11

Tags 0

Key-Value Pairs 0

Attachments 0

Comments 0

Ratings 0

Others 0
