# Supplementary material for: A collaborative semantic-based provenance management platform for reproducibility
Source: PeerJ journal article supplement (doi:10.7717/peerj-cs.921), 2022-03-10
Supplement: UsabilityQuestionnaire.pdf [file UsabilityQuestionnaire.pdf]

# CAESAR (Collaborative Environment for Scientific Analysis with Reproducibility) Evaluation

1. Please rate the perceived usefulness of CAESAR.

|                                                                                                                   | Strongly Agree | Agree | Neither agree nor disagree | Disagree | Strongly disagree |
|-------------------------------------------------------------------------------------------------------------------|----------------|-------|----------------------------|----------|-------------------|
| It enables me to organize my experimental data more efficiently                                                   |                |       |                            |          |                   |
| Preserving data in CAESAR helps the new comers in the project to understand the ongoing work in the team          |                |       |                            |          |                   |
| It helps me to search all the data related to my experiments including images, their metadata and device settings |                |       |                            |          |                   |
| It enables a collaborative environment among my team members                                                      |                |       |                            |          |                   |
| It enables me to visualize all the experimental data and results effectively                                      |                |       |                            |          |                   |
| It enables me to link the images to the experimental data and results                                             |                |       |                            |          |                   |

2. Please rate the following questions in regard to your experience with CAESAR.

|                                                         | Strongly Agree | Agree | Neither agree nor disagree | Disagree | Strongly disagree |
|---------------------------------------------------------|----------------|-------|----------------------------|----------|-------------------|
| CAESAR is useful for your scientific data management    |                |       |                            |          |                   |
| CAESAR is user-friendly                                 |                |       |                            |          |                   |
| CAESAR provides a collaborative environment among teams |                |       |                            |          |                   |
| It is easy to learn to use it                           |                |       |                            |          |                   |

3. What do you think about the following features in CAESAR?

|                                                                                                                               | Strongly Like | Like | Neither like nor dislike | Dislike | Strongly dislike |
|-------------------------------------------------------------------------------------------------------------------------------|---------------|------|--------------------------|---------|------------------|
| Project Dashboard (An one-place overview of all the experiments for a project)                                                |               |      |                          |         |                  |
| ProvTrack (A visualization module to track the experimental data including the link between images, experiments and metadata) |               |      |                          |         |                  |
| ProvBook (A computational Reproducibility framework for data analysis scripts in Jupyter Notebook)                            |               |      |                          |         |                  |

4. Please let us know the overall feedback of CAESAR along with its positive aspects and the things to improve.
